# Supplementary material
Source: MDPI journal article supplement (https://www.mdpi.com/2079-9284/9/6/126)
Supplement: s1 [file s1]

**Table S1. List of methicillin-resistant *Staphylococcus aureus***

| Microorganisms                   | Collection code No. |
|----------------------------------|---------------------|
| <i>Staphylococcus aureus</i> 285 | CCARM 0204          |
| <i>Staphylococcus aureus</i> 503 | CCARM 0205          |
| <i>Staphylococcus aureus</i>     | CCARM 3855          |
| <i>Staphylococcus aureus</i>     | CCARM 3089          |

**Table S2. Oligonucleotide primers used for RT-PCR**

| NCBI accession code | Primer <sup>a</sup>      | Sequence (5'-3')                         |
|---------------------|--------------------------|------------------------------------------|
| XM_011526432.2      | Human GAPDH              | Sense<br>ACC ACA GTC CAT GCC ATC AC      |
|                     |                          | Antisense<br>CCA CCA CCC TGT TGC TGT AG  |
| NM_001145938.2      | Human MMP-1              | Sense<br>TGC GCA CAA ATC CCT TCT AC      |
|                     |                          | Antisense<br>TTC AAG CCC ATT TGG CAG TT  |
| NM_000660.7         | Human TGF $\beta$ -1     | Sense<br>GCC CTG GAC ACC AAC TAT TGC     |
|                     |                          | Antisense<br>GCT GCA CTT GCA GGA GCG CAC |
| NM_000088.4         | Human Procollagen Type I | Sense<br>CTC GAG GTG GAC ACC CT          |
|                     |                          | Antisense<br>CAG CTG GAT GGC CAC ATC GG  |

**a: Primer design based on the NCBI/Primer-BLAST tool with standard parameters**
